# Supplementary material for: A benchmark dataset for machine learning in ecotoxicology
Source: Springer Nature journal article supplement (doi:10.1038/s41597-023-02612-2), 2023-10-18
Supplement: MOESM1 [file 41597_2023_2612_MOESM1_ESM.pdf]

# A benchmark dataset for machine learning in ecotoxicology

**Christoph Schür<sup>1,†,\*</sup>, Lilian Gasser<sup>2,†</sup>, Fernando Perez-Cruz<sup>2,4</sup>, Kristin Schirmer<sup>1,3,5</sup>, and Marco Baity-Jesi<sup>1</sup>**

<sup>1</sup>Eawag, Swiss Federal Institute of Aquatic Science and Technology, Dübendorf, Switzerland

<sup>2</sup>Swiss Data Science Center (SDSC), Zürich, Switzerland

<sup>3</sup>ETH Zürich: Department of Environmental Systems Science, Zürich, Switzerland

<sup>4</sup>ETH Zürich: Department of Computer Science, Zürich, Switzerland

<sup>5</sup>EPF Lausanne, School of Architecture, Civil and Environmental Engineering, Lausanne, Switzerland

\*corresponding author: Christoph Schür (christoph.schuer@eawag.ch)

†these authors contributed equally to this work

## SUPPLEMENTARY INFORMATION

# 1 Glossary

**Table 1.** A glossary of all columns in the dataset. The prefix of the column name identifies the feature category or source file, *e.g.*, column names starting with "test" originate from the ECOTOX tests file. The dataset contains modeling features as well as additional information. Only the features labelled "suitable for modeling" should be used for modeling. The others *must not* be used. Effective concentrations are labelled as targets. Only one target should be used and the others *must not* be used as modeling feature. \*We advise modelers to investigate these features, *e.g.*, with a correlation analysis, before adding them to the model.

| Column name                       | Description                                                   | Suitable for modeling |
|-----------------------------------|---------------------------------------------------------------|-----------------------|
| <i>test_id</i>                    | Unique identifier for an experiment (links with ECOTOX)       | no                    |
| <i>reference_number</i>           | Unique identifier for the original source (links with ECOTOX) | no                    |
| <i>test_cas</i>                   | CAS number of the chemical compound                           | no                    |
| <i>test_location</i>              | Test location                                                 | no                    |
| <i>test_exposure_type</i>         | Exposure type                                                 | yes                   |
| <i>test_control_type</i>          | Control type                                                  | no                    |
| <i>test_media_type</i>            | Media type                                                    | yes                   |
| <i>test_application_freq_unit</i> | Application frequency unit                                    | no                    |
| <i>test_organism_lifestage</i>    | Organism life stage                                           | no                    |
| <i>result_id</i>                  | Unique identifier for each data point (links with ECOTOX)     | no                    |
| <i>result_effect</i>              | Effect group                                                  | no                    |
| <i>result_endpoint</i>            | Endpoint                                                      | no                    |
| <i>result_obs_duration_mean</i>   | Observation duration                                          | yes                   |
| <i>result_conc1_type</i>          | Exposure concentration type                                   | yes                   |
| <i>result_conc1_mean_op</i>       | Effective concentration operator                              | no                    |
| <i>result_conc1_mean</i>          | Effective concentration value (in <i>mg/L</i> )               | target                |
| <i>result_conc1_mean_mol</i>      | Effective concentration value (in <i>mol/L</i> )              | target                |
| <i>media_ph_mean</i>              | Measured medium pH                                            | yes                   |
| <i>media_temperature_mean</i>     | Measured medium temperature (in °C)                           | yes                   |
| <i>tax_all</i>                    | Combination of all taxonomic levels                           | no                    |
| <i>tax_name</i>                   | Common species name                                           | no                    |
| <i>tax_class</i>                  | Taxonomic class                                               | no                    |
| <i>tax_order</i>                  | Taxonomic order                                               | no                    |
| <i>tax_family</i>                 | Taxonomic family                                              | no                    |
| <i>tax_genus</i>                  | Taxonomic genus                                               | no                    |
| <i>tax_species</i>                | Taxonomic species                                             | no                    |
| <i>tax_gs</i>                     | Taxonomic genus and species                                   | no                    |
| <i>species_number</i>             | Species identifier (links with ECOTOX)                        | no                    |
| <i>tax_group</i>                  | Taxonomic group                                               | no                    |
| <i>tax_pdm_available</i>          | Boolean whether phylogenetic distance is available            | no                    |
| <i>tax_eco_climate</i>            | Ecology, climate zone                                         | yes                   |
| <i>tax_eco_ecozone</i>            | Ecology, ecozone                                              | yes                   |
| <i>tax_eco_food</i>               | Ecology, food class                                           | yes                   |
| <i>tax_eco_migrate5</i>           | Ecology, migratory behavior (5-level encoding)                | yes                   |
| <i>tax_eco_migrate2</i>           | Ecology, migratory behavior (2-level encoding)                | yes                   |
| <i>tax_lh_aml</i>                 | Life history, life span (in <i>d</i> )                        | yes                   |
| <i>tax_lh_lbcm</i>                | Life history, body length at birth (in <i>cm</i> )            | yes                   |
| <i>tax_lh_lpcm</i>                | Life history, body length at puberty (in <i>cm</i> )          | yes                   |
| <i>tax_lh_licm</i>                | Life history, ultimate body length (in <i>cm</i> )            | yes                   |
| <i>tax_lh_ri#/d</i>               | Life history, reproductive rate (in <i>#/d</i> )              | yes                   |
| <i>tax_ps_ampv</i>                | Pseudo-data, energy conductance (in <i>cm/d</i> )             | yes                   |
| <i>tax_ps_ampkap</i>              | Pseudo-data, allocation fraction to soma                      | yes                   |

Table 1 continued from previous page

| Column name                         | Description                                                                  | Suitable for modeling |
|-------------------------------------|------------------------------------------------------------------------------|-----------------------|
| <i>tax_ps_amppm</i>                 | Pseudo-data, volume-specific somatic maintenance cost (in $J/d \cdot cm^3$ ) | yes                   |
| <i>result_conc1_mean_binary</i>     | Effective concentration category (more toxic/less toxic)                     | target                |
| <i>result_conc1_mean_log</i>        | Effective mass concentration value after a log10 transformation              | target                |
| <i>result_conc1_mean_mol_log</i>    | Effective molar concentration value after a log10 transformation             | target                |
| <i>chem_dtxsid</i>                  | DSSTOX substance ID                                                          | no                    |
| <i>chem_name</i>                    | Name of chemical compound                                                    | no                    |
| <i>test_cas_name</i>                | Concatenation of CAS number and name of chemical compound                    | no                    |
| <i>chem_sf</i>                      | Molecular formula                                                            | no                    |
| <i>chem_mw</i>                      | Molecular weight (in $g/mol$ )                                               | yes                   |
| <i>chem_mp</i>                      | Melting point (in $^{\circ}C$ )                                              | yes                   |
| <i>chem_ws</i>                      | Water solubility (in $mg/L$ )                                                | yes                   |
| <i>chem_ws_binary</i>               | Boolean whether water solubility is available                                | no                    |
| <i>chem_dtxcid</i>                  | DSSTOX compound ID                                                           | no                    |
| <i>chem_inchi</i>                   | InChI from DSSTox                                                            | no                    |
| <i>chem_inchikey</i>                | InChIkey from DSSTox                                                         | no                    |
| <i>chem_pcp_cid</i>                 | PubChem compound ID                                                          | no                    |
| <i>chem_pcp_inchi</i>               | InChI from PubChem                                                           | no                    |
| <i>chem_pcp_inchikey</i>            | InChIkey from PubChem                                                        | no                    |
| <i>chem_pcp_iupac_name</i>          | IUPAC name                                                                   | no                    |
| <i>chem_pcp_can_smiles</i>          | Canonical SMILES from PubChem                                                | no                    |
| <i>chem_pcp_fp</i>                  | Collapsed PubChem fingerprint                                                | yes                   |
| <i>chem_pcp_heavy_atom_count</i>    | Number of heavy atoms, <i>i.e.</i> , not hydrogen                            | yes                   |
| <i>chem_rdkit_clogp</i>             | Octanol-water partition coefficient                                          | yes                   |
| <i>chem_rdkit_can_smiles</i>        | Canonical SMILES from RDKit                                                  | no                    |
| <i>chem_pcp_bonds_count</i>         | Number of bonds                                                              | yes                   |
| <i>chem_pcp_doublebonds_count</i>   | Number of double bonds                                                       | yes                   |
| <i>chem_pcp_triplebonds_count</i>   | Number of triple bonds                                                       | yes                   |
| <i>chem_rings_count</i>             | Number of rings                                                              | yes                   |
| <i>chem_OH_count</i>                | Number of OH groups                                                          | yes                   |
| <i>chem_mol2vec_allowed</i>         | Boolean: compatible with mol2vec                                             | no                    |
| <i>chem_pka_median</i>              | Acid dissociation constant                                                   | yes                   |
| <i>chem_MACCS_fp</i>                | Collapsed MACCS fingerprint                                                  | yes                   |
| <i>chem_Morgan_fp</i>               | Collapsed Morgan fingerprint                                                 | yes                   |
| <i>chem_ToxPrint_fp</i>             | Collapsed ToxPrint fingerprint                                               | yes                   |
| <i>chem_mol2vec[000-299]</i>        | 300-dimensional mol2vec embedding                                            | yes                   |
| <i>chem_mordred_x</i>               | Mordred features                                                             | yes*                  |
| <i>split_totallyrandom</i>          | Split data points totally at random (incl. cross-validation folds)           | no                    |
| <i>split_random</i>                 | Split chemicals at random (incl. cross-validation folds)                     | no                    |
| <i>split_occurrence</i>             | Split chemicals by occurrence (incl. cross-validation folds)                 | no                    |
| <i>split_scaffold-murcko</i>        | Split chemicals by Murcko scaffold (incl. cross-validation folds)            | no                    |
| <i>split_scaffold-murcko-loo-0</i>  | Split chemicals by Murcko scaffold (only training and test set)              | no                    |
| <i>split_scaffold-murcko-loo-1</i>  | Split chemicals by Murcko scaffold (only training and test set)              | no                    |
| <i>split_scaffold-murcko-llo</i>    | Split chemicals by Murcko scaffold (only training and test set)              | no                    |
| <i>split_scaffold-generic</i>       | Split chemicals by generic scaffold (incl. cross-validation folds)           | no                    |
| <i>split_scaffold-generic-loo-0</i> | Split chemicals by generic scaffold (only training and test set)             | no                    |
| <i>split_scaffold-generic-loo-1</i> | Split chemicals by generic scaffold (only training and test set)             | no                    |
| <i>split_scaffold-generic-llo</i>   | Split chemicals by generic scaffold (only training and test set)             | no                    |

## 2 ECOTOX data

Definitions for ECOTOX effect groups as given in the [ECOTOX term appendix](#):

- **Mortality (MOR):** Measurements and endpoints where the cause of death is by direct action of the chemical.
- **Physiology (PHY)/Intoxication (ITX):** Measurements and endpoints regarding basic activity in cells and tissues of plants or animals; includes four effect groups - injury, immunity, intoxication and general physiological response.
- **Growth (GRO):** Category encompasses measures of weight and length, and includes effects on development, growth and morphology.
- **Population (POP):** Measurements and endpoints relating to a group of organisms or plants of the same species occupying the same area at a given time.

### 2.1 Toxicity categories

The toxicity intervals given in Table 2 and shown for the chemicals in our dataset in Figure 3 are in accordance with EPA.

**Table 2.** EC50 intervals for the binary and multi-class toxicity classification used in Figure 3.

| EC50 interval (mg/L) | Binary classification | Multi-class classification |
|----------------------|-----------------------|----------------------------|
| $(-\infty, 10^{-1}]$ | more toxic            | very highly toxic          |
| $(10^{-1}, 10^0]$    | more toxic            | highly toxic               |
| $(10^0, 10^1]$       | less toxic            | moderately toxic           |
| $(10^1, 10^2]$       | less toxic            | slightly toxic             |
| $(10^2, +\infty)$    | less toxic            | non-toxic                  |

### 2.2 Reference chronology

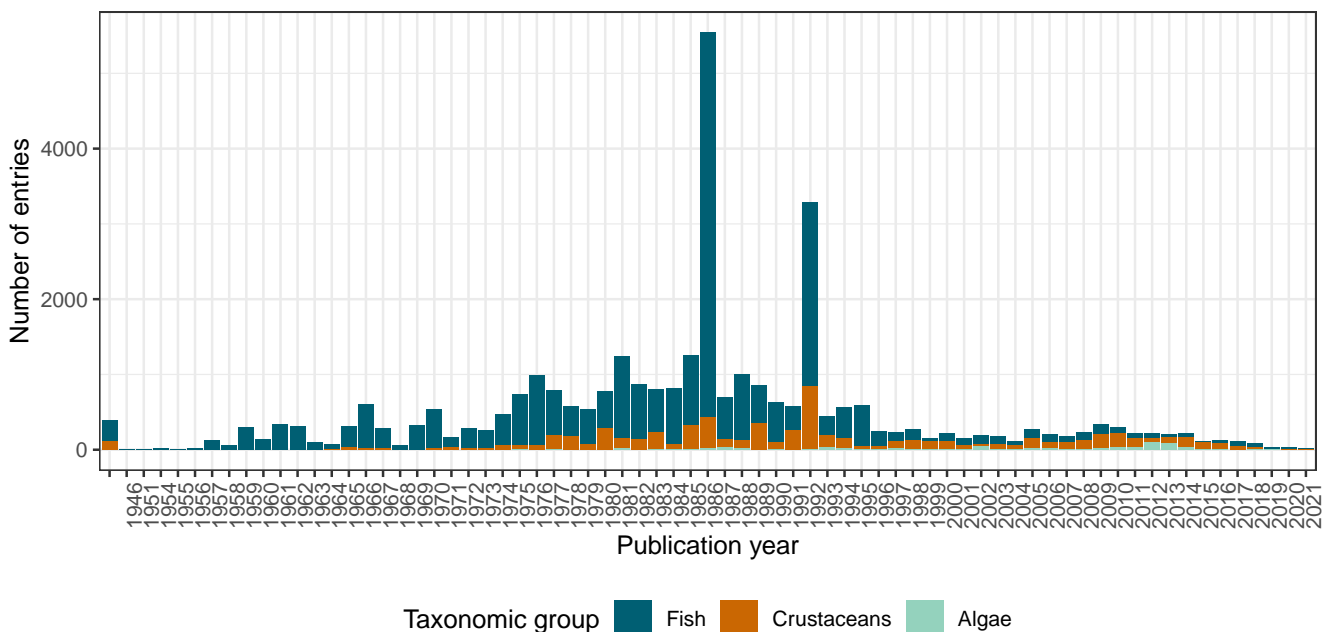

**Figure 1.** Chronology of the references related to the different taxonomic groups added to ECOTOX over time. The publication year refers to the year the original study was published. It is noteworthy that some references are not singular scientific studies, but entail whole databases, such as the US EPA "Pesticide Ecotoxicity Database (Formerly: Environmental Effects Database (EEDB))", added in 1992.

## 2.3 Experimental properties

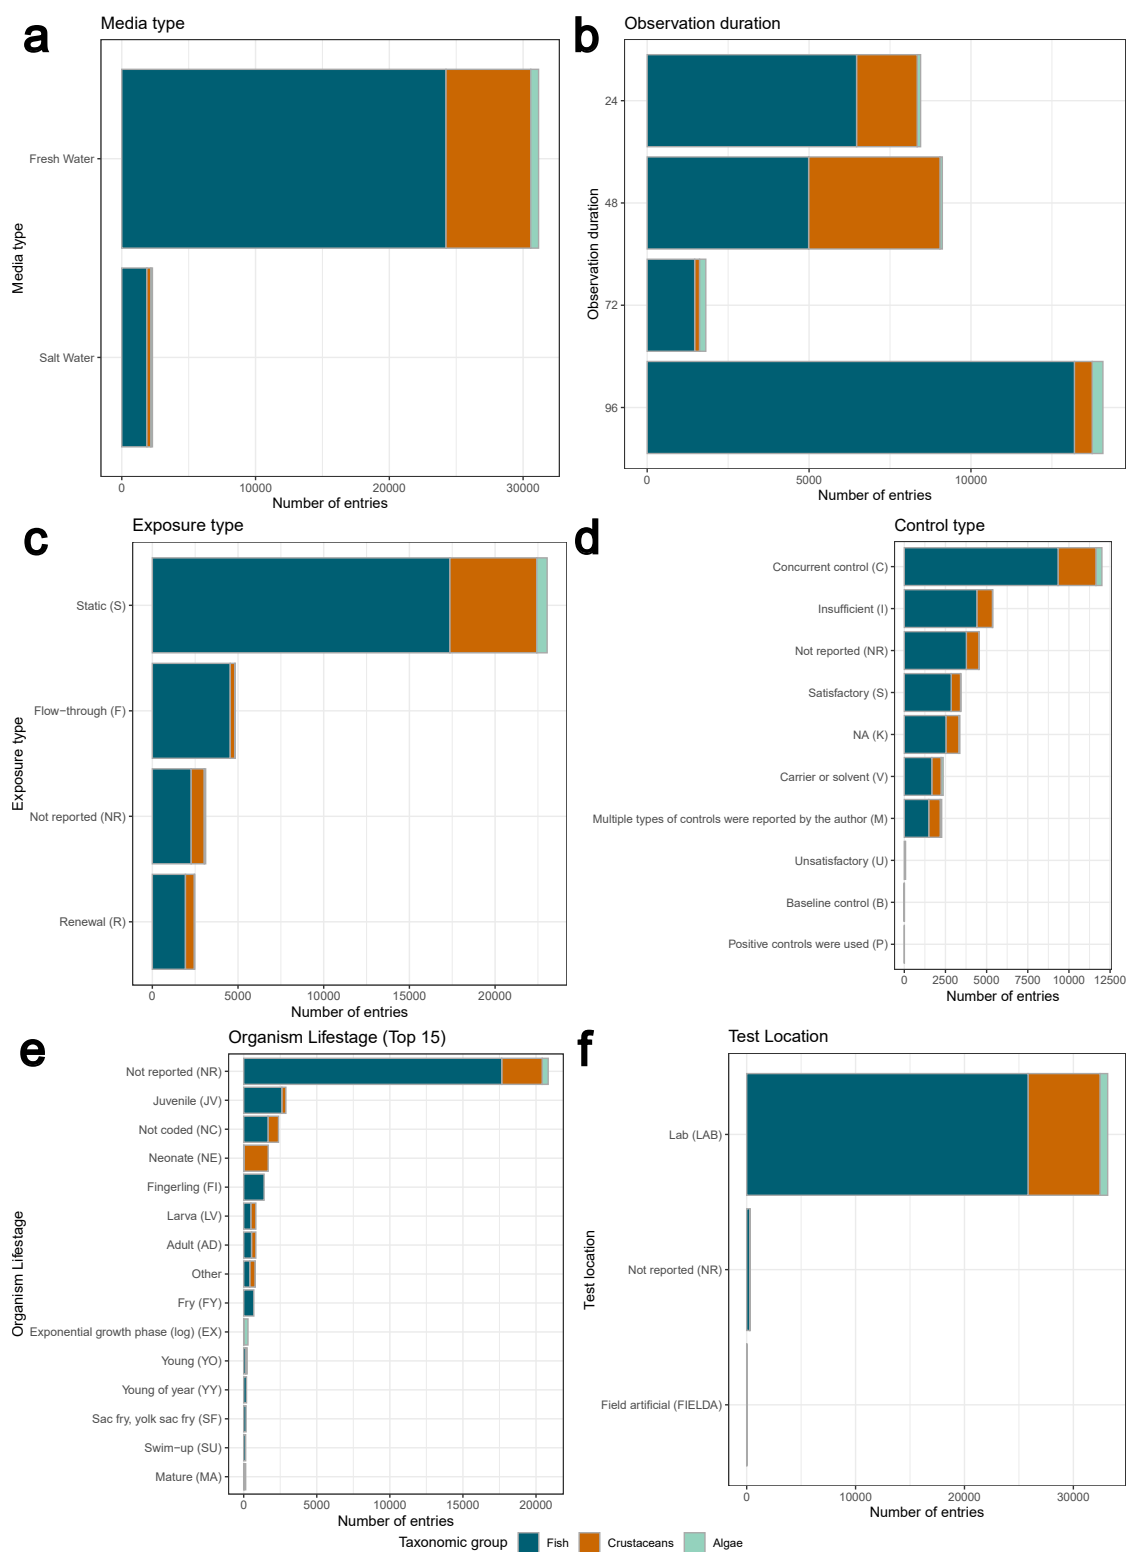

**Figure 2.** Overview of the most common values for experimental properties parameters. a: Media type; b: Observation duration; c: Exposure type; d: Control type; e: Organism life stage (only the top 15 of 48 total, less-abundant life stages are combined into "other"); f: Test location.

### 3 Taxonomic data

#### 3.1 Overview

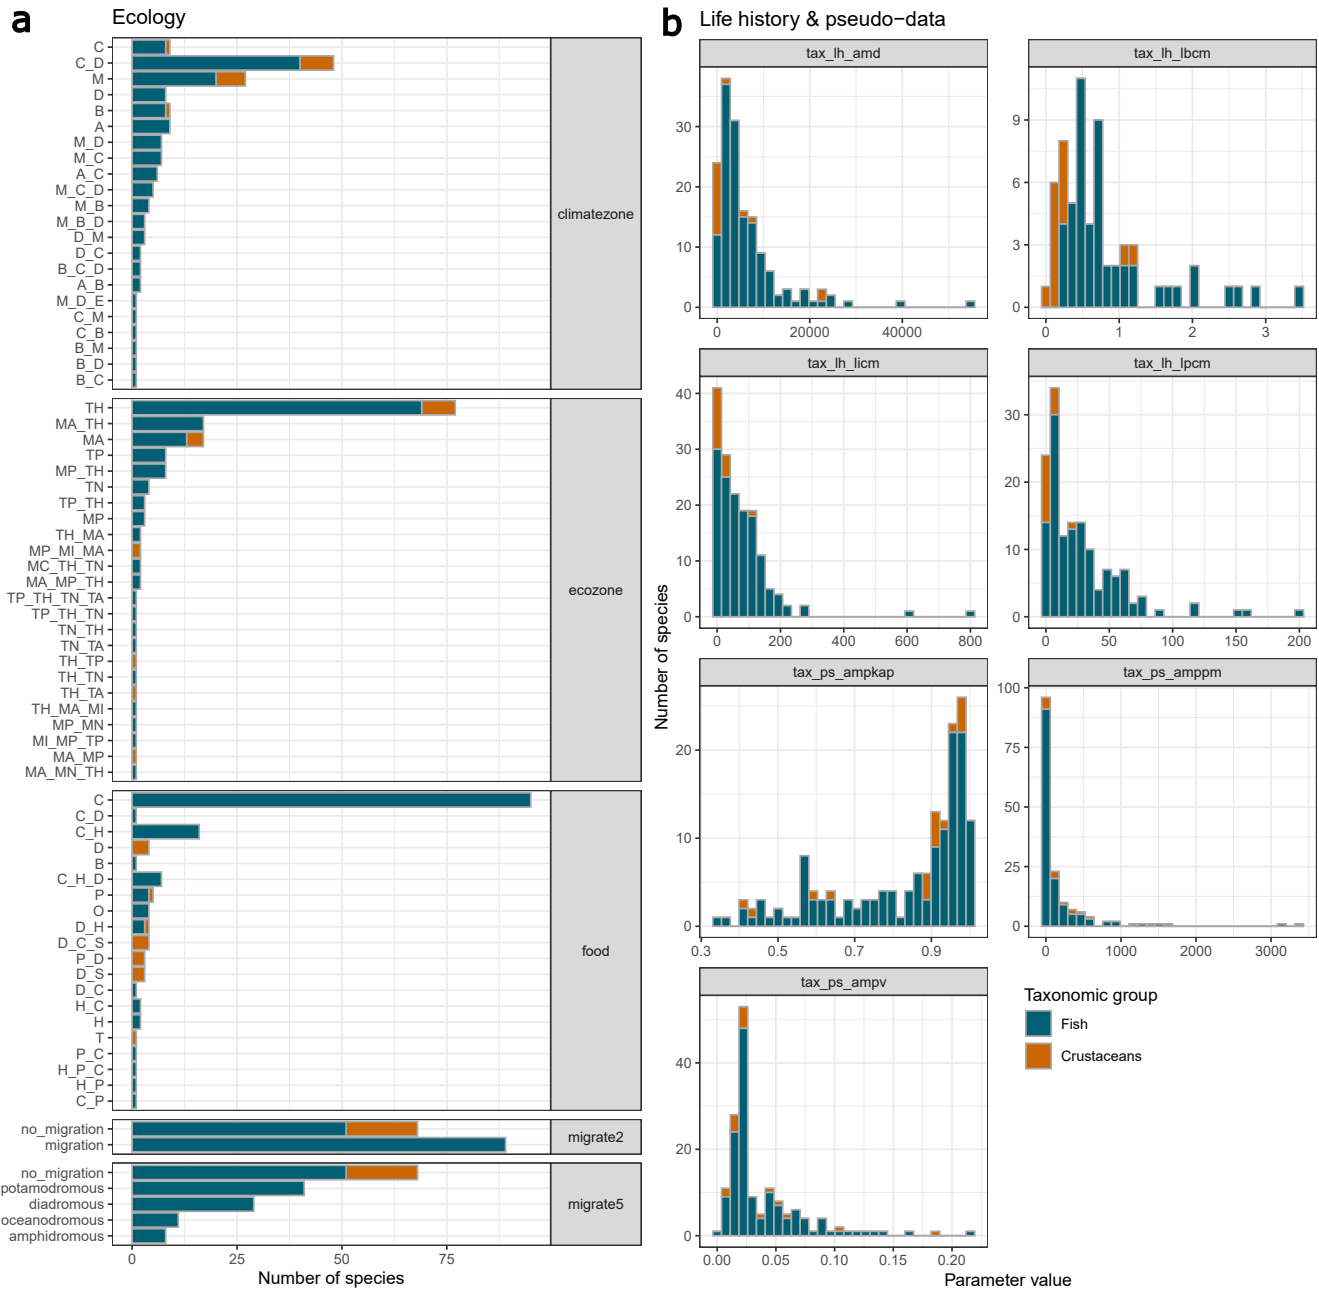

**Figure 3.** a: Overview of the taxonomic properties for ecology. b: Overview for life history and pseudo-data parameter values. The encodings for the different levels are given in Supplementary Tables 3-6.

#### 3.2 Ecological data encoding

Here, we provide the encodings for the ecological data. For some parameters, we had to reduce the complexity of the encodings. More detailed descriptions of the parameters and the original encoding can be found in the [Add my Pet collection](#)

### 3.2.1 Climate zone

**Table 3.** Climate zone definitions and encodings.

| Encoding | Definition                                                                                                                              |
|----------|-----------------------------------------------------------------------------------------------------------------------------------------|
| A        | Tropical (megathermal) climates: every month of the year with an average temperature of 18 °C or higher, with significant precipitation |
| B        | Dry (arid and semi-arid) climates: little precipitation                                                                                 |
| C        | Temperate (mesothermal) climates: the coldest month averaging between 0 and 18 °C and at least one month averaging above 10 °C          |
| D        | Continental (microthermal) climates: at least one month averaging below -3 °C and at least one month averaging above 10 °C              |
| E        | Polar and alpine (montane) climates: every month of the year with an average temperature below 10 °C                                    |
| M        | Marine climates                                                                                                                         |

### 3.2.2 Ecozone

**Table 4.** Ecozone definitions and encodings.

| Encoding | Definition                                               |
|----------|----------------------------------------------------------|
| MA       | Atlantic ocean                                           |
| MC       | Circumglobal oceans                                      |
| MI       | Indian ocean                                             |
| MN       | Arctic ocean                                             |
| MP       | Pacific ocean                                            |
| MS       | Southern ocean                                           |
| TA       | Australasia (including New Guinea, New Zealand)          |
| TH       | Holarctic                                                |
| TN       | Neotropic (including Central America, and the Caribbean) |
| TP       | Paleotropic                                              |

### 3.2.3 Migratory behavior

**Table 5.** Migratory definitions and encodings for 2 and 5 levels.

| 2-level encoding | 5-level encoding | Definition                                                               |
|------------------|------------------|--------------------------------------------------------------------------|
| no_migration     | no_migration     | Do not migrate                                                           |
| migration        | amphidromous     | Migrate from fresh water to the sea, or vice versa, but not for breeding |
| migration        | diadromous       | Migrate between the sea and fresh water                                  |
| migration        | oceanodromous    | Live and migrate wholly in the sea                                       |
| migration        | potamodromous    | Live and migrate wholly within fresh water                               |

### 3.2.4 Food

**Table 6.** Food definitions and encodings.

| Encoding | Definition                                                                                |
|----------|-------------------------------------------------------------------------------------------|
| B        | Bacterivore (including micro-organisms)                                                   |
| C        | Carnivore (living animals)                                                                |
| D        | Detrivore (bacteria, small fungi, organic matter)                                         |
| H        | Herbivore (plants)                                                                        |
| O        | Omnivore (plants/animals/fungi)                                                           |
| P        | Planktivore (small aquatic organisms, macro-movement controlled by flow, not by swimming) |
| S        | Scavenger (dead animals)                                                                  |
| T        | Parasitic (animal tissue)                                                                 |

## 4 Chemical data

### 4.1 Tanimoto similarity

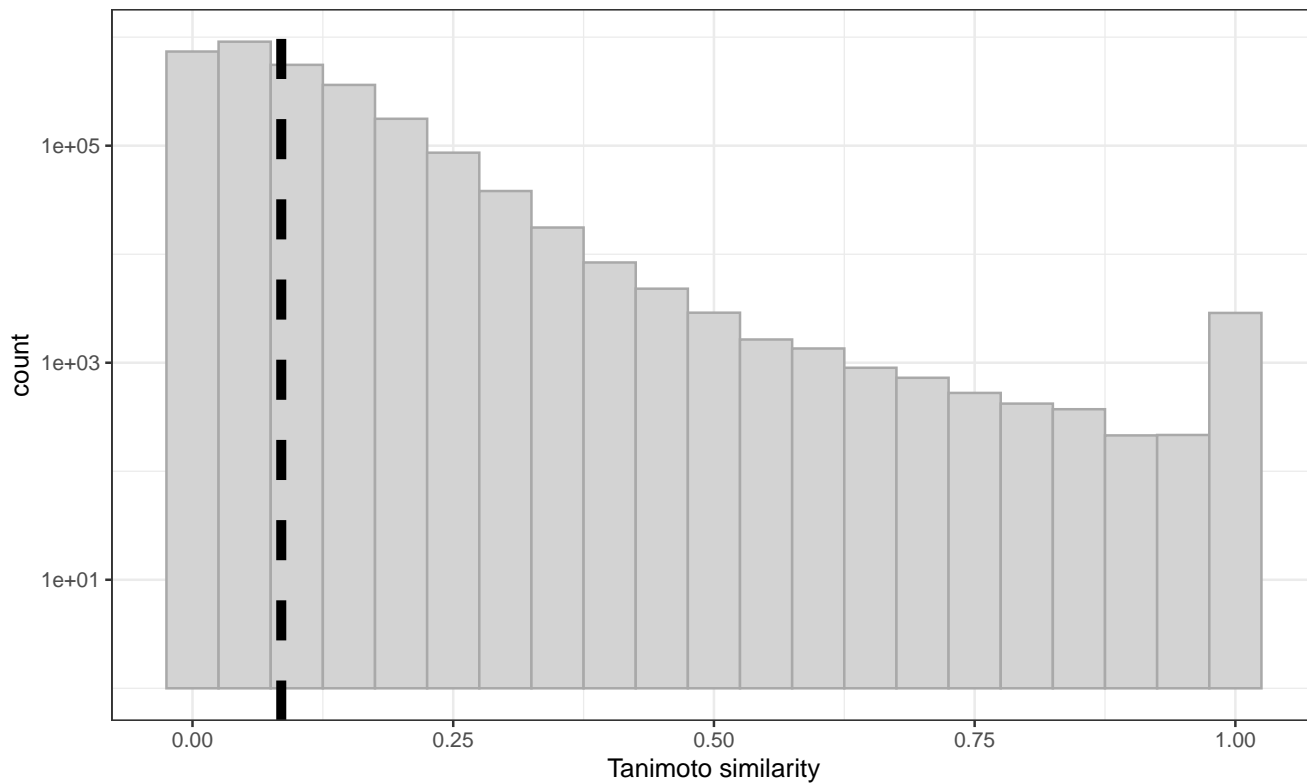

**Figure 4.** Histogram of the Tanimoto similarities for the chemicals in our dataset, ranging from 0 (dissimilar) to 1 (equal). The dashed vertical line indicates the mean similarity of 0.085.



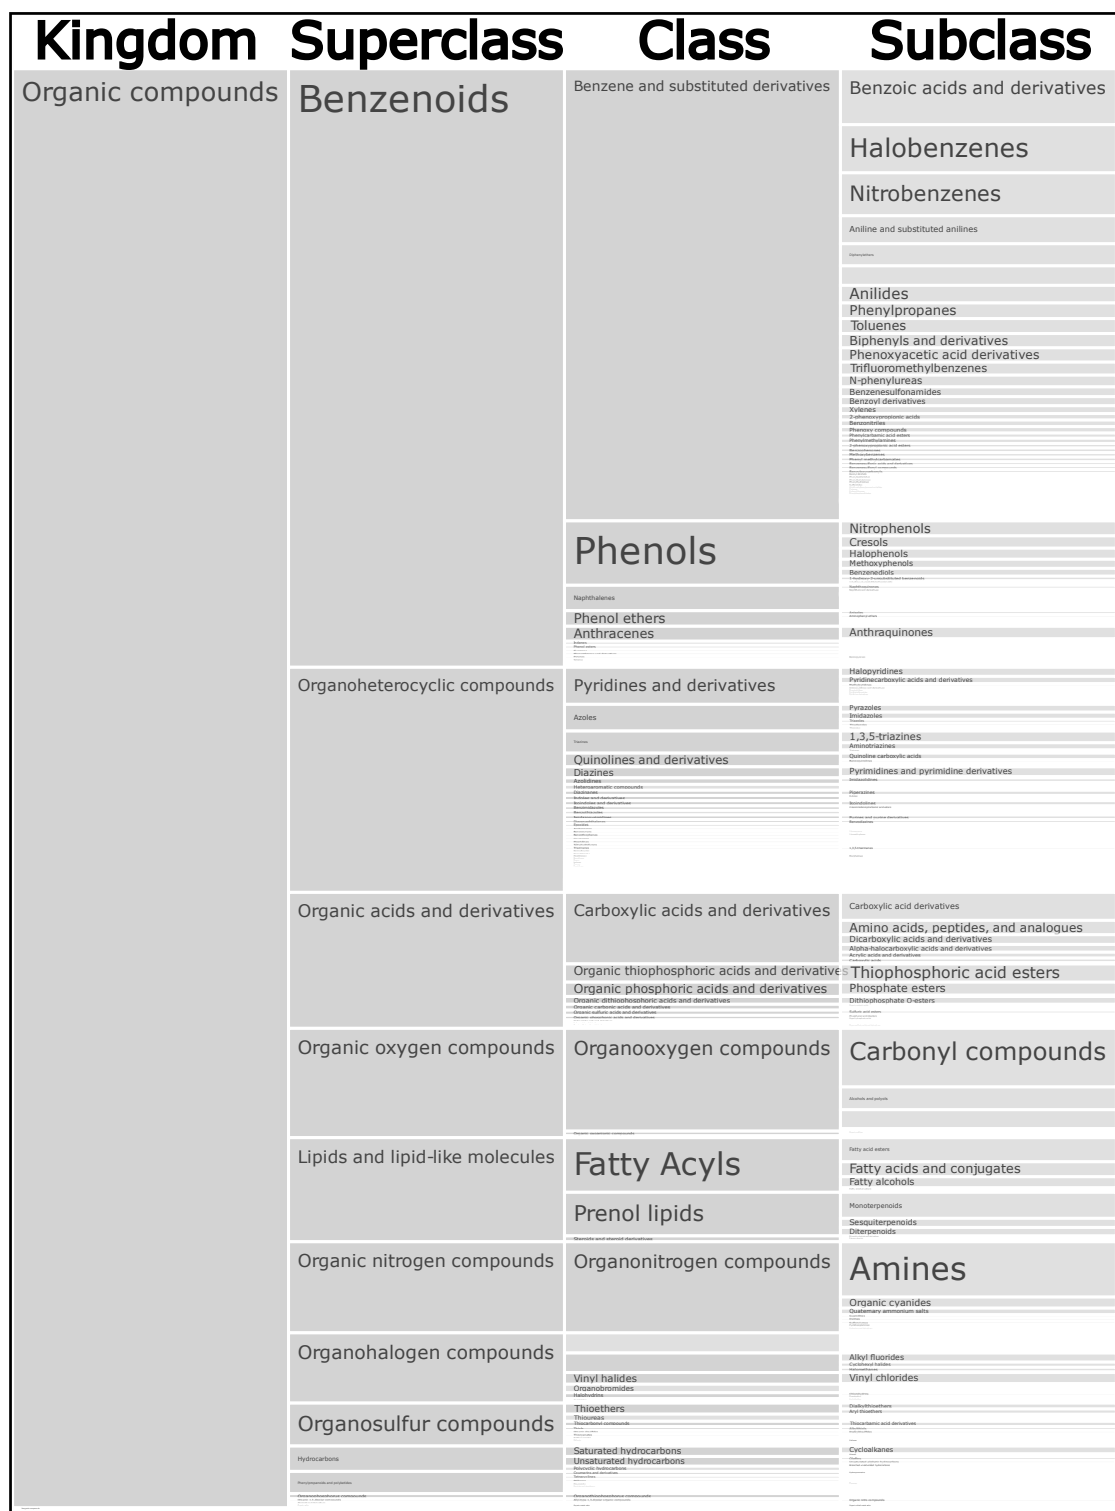

**Figure 5.** Icicle chart representing the chemical ontology for 2,250 of the 2,408 chemicals in our dataset, with the hierarchical levels kingdom, superclass, class, and subclass.

### 4.3 Chemical properties

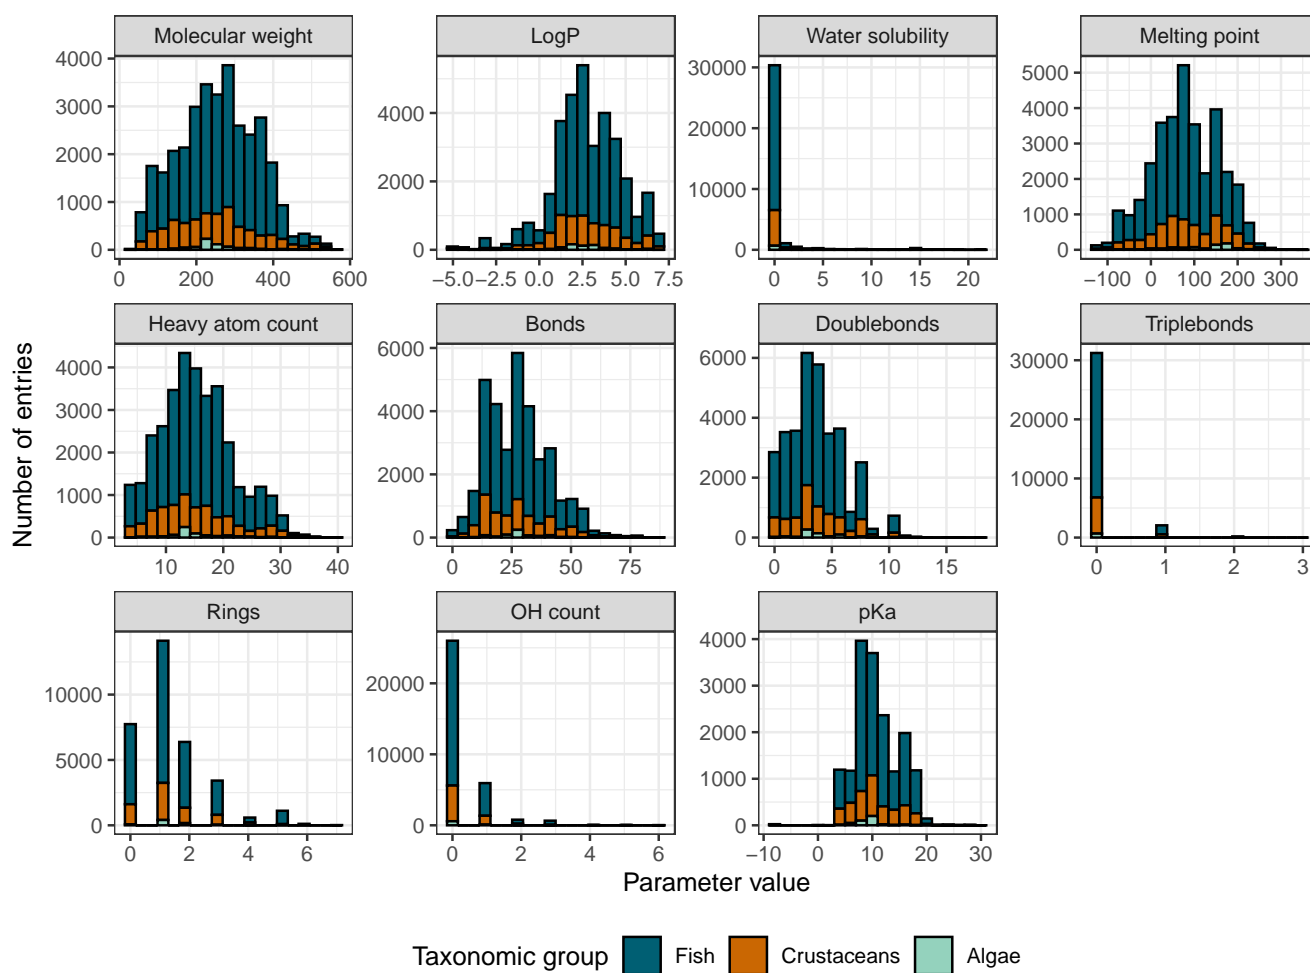

**Figure 6.** Overview of the distributions of the chemical properties represented in our dataset. See Table 5 in the main manuscript for more details.

## 4.4 Functional use categories

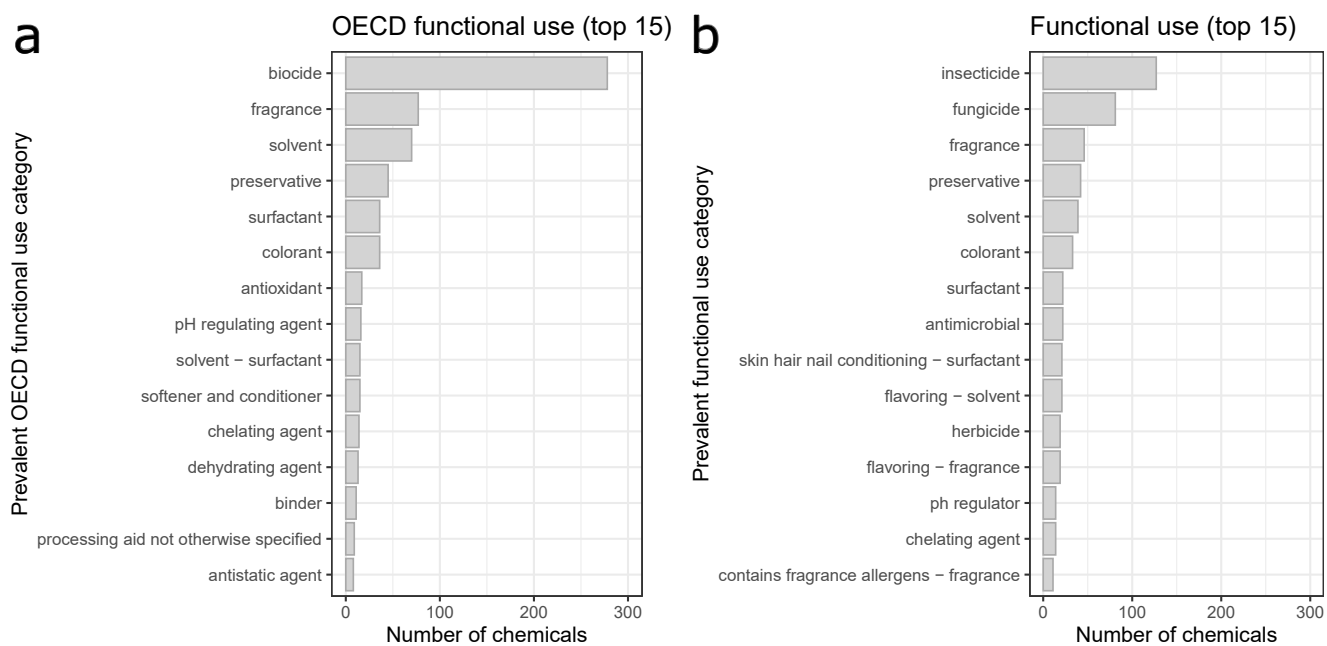

**Figure 7.** Prevalent functional use categories for 570 of the 2,408 chemicals in our dataset. Most chemicals have several reported uses of which we select the prevalent ones, *i.e.*, those reported in at least 20% of the cases for each chemical. a: Internationally harmonized OECD functional uses, b: non-harmonized functional uses distinguish between the different biocides.

## 4.5 Molecular scaffolds

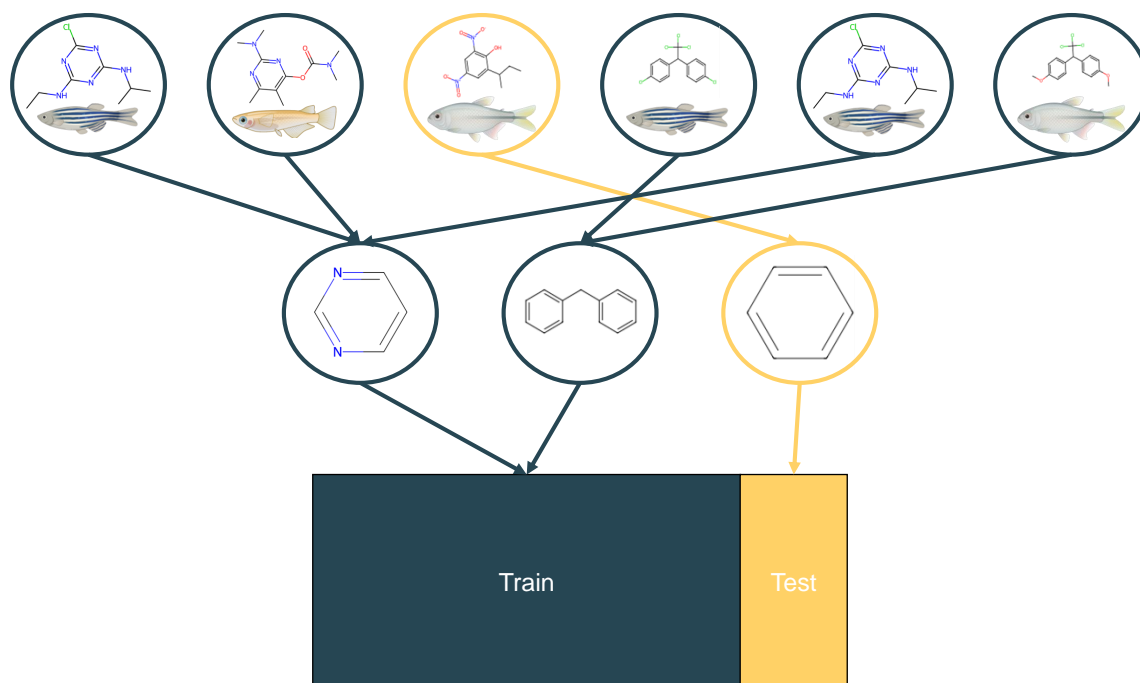

**Figure 8.** Schematic visualization of stratified data splitting according to the molecular scaffold. In the first step, all molecules that share a molecular scaffold are grouped together. Then, these groups are distributed into a training and a test set. This procedure reduces data leakage by ensuring that similar chemicals - defined by a common molecular scaffold - do not occur both in the train and test set.

**Table 7.** Canonical SMILES and chemical structures of the most common Murcko scaffolds. We do not include "no scaffold" here.

| Canonical SMILES                 | Structure                                                                             |
|----------------------------------|---------------------------------------------------------------------------------------|
| <chem>c1ccccc1</chem>            | 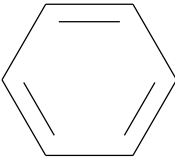 |
| <chem>c1ccc(Cc2ccccc2)cc1</chem> |  |
| <chem>c1ccncc1</chem>            |  |

Table 7 continued from previous page

| Canonical SMILES                             | Structure                                                                             |
|----------------------------------------------|---------------------------------------------------------------------------------------|
| <chem>c1ccc2ccccc2c1</chem>                  | 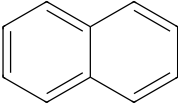   |
| <chem>O=C(OCc1cccc(Oc2ccccc2)c1)C1CC1</chem> |    |
| <chem>C1=CC2CC1C1C3CC(C4OC34)C21</chem>      |    |
| <chem>C1CCCCC1</chem>                        |   |
| <chem>O=C(Nc1ccccc1)c1ccccc1</chem>          |  |
| <chem>O=c1[nH]nnc2ccccc12</chem>             |  |
| <chem>O=S1OCC2C3C=CC(C3)C2CO1</chem>         |  |
| <chem>c1ncncn1</chem>                        |  |

Table 7 continued from previous page

| Canonical SMILES                                 | Structure                                                                             |
|--------------------------------------------------|---------------------------------------------------------------------------------------|
| <chem>c1cncnc1</chem>                            | 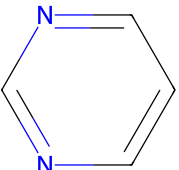   |
| <chem>O=C1c2ccc3c(c2OC2COc4ccccc4C12)CCO3</chem> |    |
| <chem>O=C(Cc1ccccc1)OCc1cccc(Oc2ccccc2)c1</chem> |    |
| <chem>c1ccc2[nH]cnc2c1</chem>                    |    |
| <chem>C1=NCCN1Cc1ccnc1</chem>                    |  |
| <chem>c1ccc(Oc2ccccc2)cc1</chem>                 |  |
| <chem>c1cc(-c2cc[nH+]cc2)cc[nH+]1</chem>         |  |
| <chem>O=c1cccn1-c1ccccc1</chem>                  |  |

| Canonical SMILES                                     | Structure |
|------------------------------------------------------|-----------|
| <chem>c1ncnc(NC2CC2)n1</chem>                        |           |
| <chem>C(=Cc1ccccc1)C(C=Cc1ccccc1)=NNC1=NCCCN1</chem> |           |
| <chem>O=C(Nc1ncnnc1)NS(=O)(=O)c1ccccc1</chem>        |           |
| <chem>c1ccc(C2OC2(Cn2cnnc2)c2ccccc2)cc1</chem>       |           |
| <chem>c1cc[n+]2c(c1)-c1cccc[n+]1CC2</chem>           |           |
| <chem>c1ccc(C2(Cn3cnnc3)OCCO2)cc1</chem>             |           |
